# Supplementary material
Source: PubMed Central journal article supplement (PMC4270376)
Supplement: bi501247z_si_001.pdf [file bi501247z_si_001.pdf]

**Supporting Information  
for**

**Phosphorylation of the kinase domain regulates autophosphorylation of myosin IIIA  
and its translocation in microvilli**

**Byung Chull An<sup>1\*</sup>, Tsuyoshi Sakai<sup>1,2\*</sup>, Shigeru Komaba<sup>1</sup>, Hiroko Kishi<sup>3</sup>, Sei Kobayashi<sup>3</sup>, Jin  
Young Kim<sup>4</sup>, Reiko Ikebe, and Mitsuo Ikebe<sup>1,2</sup>**

<sup>1</sup>Department of Microbiology and Physiological Systems, University of Massachusetts Medical  
School, Worcester, MA 01605, USA

<sup>2</sup>Department of Cellular and Molecular Biology, University of Texas Health Science Center at  
Tyler, TX75708, USA

<sup>3</sup>Department of Molecular Physiology and Medical Bioregulation, Yamaguchi University  
Graduate School of Medicine, Ube, Japan 755-8505

<sup>4</sup>Division of Mass Spectrometry, Korea Basic Science Institute, Ochang-eup, Cheongwon-gun,  
Chungbuk, Korea 363-883

To whom correspondence should be addressed (Email: Mitsuo.Ikebe@uthct.edu)

A

|        |     |                                                                    |     |
|--------|-----|--------------------------------------------------------------------|-----|
| hMyo3A | 1   | ----- MFPLI GKTI I FDNFPDPSDTWEI TETI GKGT                         | 31  |
| hMyo3B | 1   | ----- MKHLYGLFHYNPAMLGLESLPDPTDITWEI I ETI GKGT                    | 37  |
| HGK    | 1   | ----- MANDSPAKSLVDI DLSLRDPAGI FELVEVVNGT                          | 35  |
| M NK   | 1   | ----- MGDPAPARSLDDI DLSALRDPAGI FELVEVVNGT                         | 35  |
| TNI K  | 1   | ----- MASDSPARSLDEI DLSALRDPAGI FELVEVVNGT                         | 35  |
| NRK    | 1   | MAGPGGWRDREVTDLGHLPDPTGI FSLDKTI GLGTYGRI YLGLHEKTGAFTAVKVMARK     | 60  |
|        |     | .....                                                              |     |
|        |     | 73                                                                 |     |
| hMyo3A | 32  | YGKVFVLNKKNGQKAAVKI LDP I HDI DEEI EAEYNI LKALS DHPNVRFYGI YFKDKV  | 91  |
| hMyo3B | 38  | YGKVKVTKNRDGS LAAVKI LDPVSDMDEEI EAEYNI LQFLPNHPNVVKFYGMFYKADHC    | 97  |
| HGK    | 36  | YQQVYKGRHVKTGQLAAI KVMVTEDEEEEEI KLEI NMLKKYS HHRNI ATYYGAFI KKSPP | 95  |
| M NK   | 36  | YQQVYKGRHVKTGQLAAI KVMVTEDEEEEEI KQEI NMLKKYS HHRNI ATYYGAFI KKSPP | 95  |
| TNI K  | 36  | YQQVYKGRHVKTGQLAAI KVMVTEDEEEEEI KQEI NMLKKYS HHRNI ATYYGAFI KKNPP | 95  |
| NRK    | 61  | TPLPEI GRRVRVVKYQKSVGWRYS - DEEEDLRTTELNLLRKYS EHKNI VSFYGAFFKLSPP | 119 |
|        |     | .....                                                              |     |
|        |     | 177 178 184 188                                                    |     |
| hMyo3A | 92  | N- GDKLWLVLELCSGGSVTDLVKGF LKRGERMSEPLI AYI LHEALMGLQHLHNNKI HRD   | 150 |
| hMyo3B | 98  | V- GGQLWLVLELCNGGSVITELVKGLLRCCQRLDEAM S YI LYGALLGLQHLHNNRI I HRD | 156 |
| HGK    | 96  | GHDDQLWLVMEFCGAGSI TDLVKN - TKGNLTKEDW AYI SREI LRGLAHLHI HVI HRD  | 153 |
| M NK   | 96  | GNDQLWLVMEFCGAGSVTDLVKN - TKGNALKEDECI AYI CREI LRGLAHLHAHKVI HRD  | 153 |
| TNI K  | 96  | GMDQLWLVMEFCGAGSVTDLI KN - TKGNLTKEDW AYI CREI LRGLSHLHQRKVI HRD   | 153 |
| NRK    | 120 | GQRHLWVMELCAAGSVTDVVRM - TSNQSLKEDW AYI CREI LQGLAHLHAHKVI HRD     | 177 |
|        |     | .....                                                              |     |
| hMyo3A | 151 | VKGNLI LLTTEGGVKLVDFGVS AQLTS TRHRRNTS VGI PFWVAPEVI ACEQLDITTYDAR | 210 |
| hMyo3B | 157 | VKGNLI LLTTEGGVKLVDFGVS AQLTS TRLRRTNS VGI PFWVAPEVI ACEQQYDSYDAR  | 216 |
| HGK    | 154 | I KGQNVLLTENAEVKLVDFGVS AQLDRTVGRRTNF I GIPYWAPEVI ACENPDATYDAR    | 213 |
| M NK   | 154 | I KGQNVLLTENAEVKLVDFGVS AQLDRTVGRRTNF I GIPYWAPEVI ACENPDATYDAR    | 213 |
| TNI K  | 154 | I KGQNVLLTENAEVKLVDFGVS AQLDRTVGRRTNF I GIPYWAPEVI ACENPDATYDFK    | 213 |
| NRK    | 178 | I KGQNVLLTHNAEVKLVDFGVS AQVSRITNGRRNSF I GIPYWAPEVI DCDEDPRRSYDAR  | 237 |
|        |     | .....                                                              |     |
| hMyo3A | 211 | CDTWSLGI TAI ELGDGDPPLADLHPMRALFKI PRNPPKLRQPELWSAEFNDFI SKCLTK    | 270 |
| hMyo3B | 217 | CDVWSLGI TAI ELGDGDPPLDFDHPVKTLFKI PRNPPPTLLHPEKVEEENHFI SQCLI K   | 276 |
| HGK    | 214 | SDLWSGGI TAI EMÆGAPPLCDMPMRALFLI PRNPPRLK - SKKWSKKFFSFI EGCLVK    | 272 |
| M NK   | 214 | SDI WSLGI TAI EMÆGAPPLCDMPMRALFLI PRNPPRLK - SKKWSKKFI DFI DTCLI K | 272 |
| TNI K  | 214 | SDLWSLGI TAI EMÆGAPPLCDMPMRALFLI PRNPPRLK - SKKWSKKFSFI ESCLVK     | 272 |
| NRK    | 238 | SDVWSVGI TAI EMÆGAPPLCNLQPLEALFVI LRESAPTVK - SSGWSRKFHFMEKCTI K   | 296 |
|        |     | .....                                                              |     |
|        |     | 302                                                                |     |
| hMyo3A | 271 | DYEKRPTVSELLQHKFI TQI EGKDWLQKQLTEFI GI HQC-----                   | 310 |
| hMyo3B | 277 | DFERRPSVTHLLDHPFI KGVHGKVLFLQKQAKVLQDQKH-----                      | 336 |
| HGK    | 273 | NYMRPSTEQLLKHPFI RDQPNERQVRI QLKDHI DRTRKK-----                    | 332 |
| M NK   | 273 | TYLSRPPTEQLLKHPFI RDQPNERQVRI QLKDHI DRSRKK-----                   | 332 |
| TNI K  | 273 | NHSQRPATEQLMKHPFI RDQPNERQVRI QLKDHI DRTRKK-----                   | 332 |
| NRK    | 297 | NFLFRPTSANLQHPFVRDI KNERHVVESLTRLHTGI I KK-----                    | 356 |
|        |     | .....                                                              |     |

B

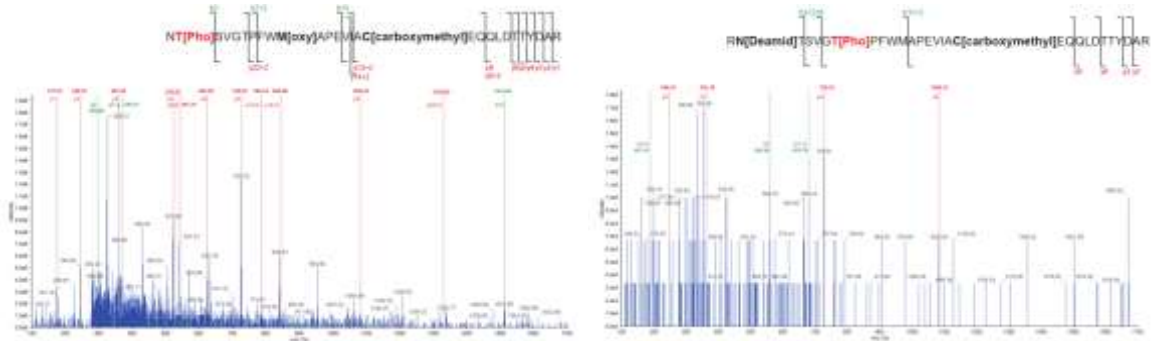

**Figure S1. Amino acid sequence alignment and comparison of myosin III with Msn protein kinases.** (A) Sequence homology of hMyo3-KD and human Msn kinases belong to the STE20 kinase family (HGK, Mitogen-activated protein kinase kinase kinase 4; MINK, TRAF2 and NCK-interacting protein kinase; TNIK, Misshapen-like kinase 1; NRK, Nik-related protein kinase). The activation loop is indicated with solid underline. Identified phosphorylated residues are indicated by grey boxes. The amino acid homology is indicated as follows: identical (asterisk), very similar (dot) (B) Mass spectrum showing two phosphorylation sites Thr<sup>184</sup> (left) and Thr<sup>188</sup> (right).

**A**

```

Hu Myo3A      1 MFPLIGKTIIFDNFPPSDTWEIETIGKTYGKVKVFNKNGKQAAVKILDPHID-ID 59
Mu Myo3A     1 MLPLIGKTIIFDNFPPSDTWEIETIGKTYGKVKVFNKNGKQAAVKILDPHID-ID 59
Sa Myo3A     1 MLPLIGKTIIFDNFPPSDTWEIETIGKTYGKVKVFNKNGKQAAVKILDPHID-ID 56
Ga Myo3A     1 MLPLTGKTIIFDNFPPSDTWEIETIGKTYGKVKVFNKNGKQAAVKILDPHID-ID 59
Xe Myo3A     1 -----MLFDGFPDPTDNDICETIGKTYGKVKVFNKNGKQAAVKILDPHEDID 52
Mo Myo3A     1 MFPQSGKSVFDFNPDPDPTDNDICETIGKTYGKVKVFNKNGKQAAVKILDPHID-ID 59
Dr Myo3A     1 -----MMLPYAQLPDKTDFEIEEIAQGVNAKVFRAKELDNDRIVALKI-QHYDEEHQ 54
              *****
              73
Hu Myo3A     60 EEIEAEYNILKALSDHPHNVRFYGYFKKDKVNGDKLWLVLELCSGGSVTDLVKGFVKRRG 119
Mu Myo3A     60 EEIEAEYNILRTLSDHPHNVRFYGYFKKDKVNGDKLWLVLELCSGGSVTDLVKGFVKRRG 119
Sa Myo3A     57 -----LCSGGSVTDLVKGLKRRG 74
Ga Myo3A     60 EEIEAEYNILKALSDHPHNVRFYGYFKKDKVNGDKLWLVLELCSGGSVTDLVKGFVKRRG 119
Xe Myo3A     53 EEIEAEYNILKALSDHPHNVRFYGYFKKDKVNGDKLWLVLELCSGGSVTDLVKGLKRRG 112
Mo Myo3A     60 EEIEAEYNILKALSDHPHNVRFYGYFKKDKVNGDKLWLVLELCSGGSVTDLVKGLKRRG 119
Dr Myo3A     55 VSTIEEYRTLRDY(D)HNPLEFYGKYLKSPNGPDEIFWVMEYCAAGTAVDMVNNKLLKLD 114
              *****
              172-178
Hu Myo3A     120 ERMSEPLIAYLHEALMGLQHLHNNKTTHRDVKGNNLLTTEGGVKLVDFGVSAQLTSTR 179
Mu Myo3A     120 ERMSEPIAYLHEALMGLQHLHNNKTTHRDVKGNNLLTTEGGVKLVDFGVSAQLSSTR 179
Sa Myo3A     75 ERMSELLIAYLHEALMGLQHLHNNKTTHRDVKGNNLLTTEGGVKLVDFGVSAQLTSTR 134
Ga Myo3A     120 ERMNELIAYLHEALMGLQHLHNNKTTHRDVKGNNLLTTEGGVKLVDFGVSAQLTSTR 179
Xe Myo3A     113 ERMSEPIAYLHEALMGLQHLHNNKTTHRDVKGNNLLTTEGGVKLVDFGVSAQLTSTR 172
Mo Myo3A     120 DRMDEAIAYLHEALMGLQHLHNNKTTHRDVKGNNLLTTHGAVKLVDFGVSAQLTSTR 179
Dr Myo3A     115 RRMREEHIAIYLRTECRATIELNRNHVLRDRDGNILLTKNGRVKLCDFGLSROVDSTL 174
              *****
              184-188
Hu Myo3A     180 HRRNTSVGPFPMMAPEVIACEQQLDSTYDARCDWISLGTAIELGGDPPPLADLHPMRAL 239
Mu Myo3A     180 HRLNTSVGPFPMMAPEVIACEQQLDSTYDARCDWISLGTAIELGGDPPPLADLHPMRAL 239
Sa Myo3A     135 HRRNTSVGPFPMMAPEVIACEQQLDSTYDARCDWISLGTAIELADGPPPLADLHPMRAL 194
Ga Myo3A     180 LRRNTSVGPFPMMAPEVIACEQQLDSTYDARCDWISLGTAIELGGDPPPLADLHPMRAL 239
Xe Myo3A     173 LHRNTSVGPFPMMAPEVIACEQQLDSTYDARCDWISLGTAIELGGDPPPLADLHPMRAL 232
Mo Myo3A     180 LRRNTSVGPFPMMAPEVIACEQQLDSTYDARCDWISLGTAIELGGDPPPLADLHPMRAL 239
Dr Myo3A     175 KGRGTIGSPCHMAPEVVSAMEAREPDITVRADYVALLGTTIEIADGKPPFADHPTRAM 234
              *****
Hu Myo3A     240 FKIPRNPPLRQPELWSAEFNDFISKCLTKDYEKRPVSDLLQHKFITQIEGKVDMLQK 299
Mu Myo3A     240 FKIPRNPPLRQPELWSAEFNDFISKCLTKDYEKRPVSDLLQHKFITQIEGKVDMLQK 299
Sa Myo3A     195 FKIPRNPPLRQPELWTAEFNDFINKCLTKDYEKRPVSDLLQHEFITQIEGKVDMLQK 254
Ga Myo3A     240 FKIPRNPPLRQPELWSAEFNDFINKCLTKDYEKRPVSDLLQHEFITQIEGKVDMLQK 299
Xe Myo3A     233 FKIPRNPPLRQPELWSAEFNDFINKHERINTKGGHFKE SMAPNQD 279
Mo Myo3A     240 FKIPRNPPLRQPELWSDFNDFISKCLTKDFELRPVLDLQHVFTQIVGREKILQK 299
Dr Myo3A     235 FQIIRNPPLRQPELWSDFNDFISELKEAENRPMVMEVHPFITELTENEDMRSS 294
              *****
              302
Hu Myo3A     300 QLTFEIGHQC 310
Mu Myo3A     300 QLMEFIDIHQC 310
Sa Myo3A     255 QLTELIEAHLQ 265
Ga Myo3A     300 QLMEFIDVHQ 310
Xe Myo3A     280 ----- 290
Mo Myo3A     300 QLTELIDLNQ 310
Dr Myo3A     295 DIAEMLELSD 305
              *****
Hu: Homo sapiens
Mu: Mus musculus
Sa: Sarcophilus harrisii (Tasmanian devil)
Ga: Gallus gallus
Xe: Xenopus
Mo: Morone saxatilis (striped sea bass)
Dr: Drosophila

```

**B**

```

177 178 184 188
|
M3A DFGVSAQL----TSTRHR--RN--TSV---GTFPFWMAPE
M3B DFGVSAQL----TSTRLR--RN--TSV---GTFPFWMAPE
HGK DFGVSAQL----DRTVGR--RN--TFI---GTFPYWMAPE
MINK DFGVSAQL----DRTVGR--RN--TFI---GTFPYWMAPE
TNIK DFGVSAQL----DRTVGR--RN--TFI---GTFPYWMAPE
NRK DFGVSAQV----SRTVGR--RN--SFI---GTFPYWMAPE
STLK3 DFGVSAFLATGDDVTRNKVRK--TFV---GTFPCWMAPE
OSR DFGVSAFLATGDDVTRNKVRK--TFV---GTFPCWMAPE
PAK2 DFGFCAQI----TPEQSK--RS--TMV---GTFPYWMAPE
PAK1 DFGFCAQI----TPEQSK--RS--TMV---GTFPYWMAPE
PAK3 DFGFCAQI----TPEQSK--RS--TMV---GTFPYWMAPE
PAK4 DFGFCAQV----SKEVPR--RK--SLV---GTFPYWMAPE
PAK5 DFGFCAQV----SKEVPR--RK--SLV---GTFPYWMAPE
PAK6 DFGFCAQI----SKDVPK--RK--SLV---GTFPYWMAPE
MST1 DFGVAGQL----TDTMAK--RN--TVI---GTFPFWMAPE
MST2 DFGVAGQL----TDTMAK--RN--TVI---GTFPFWMAPE
MST3 DFGVAGQL----TDTQIK--RN--TFV---GTFPFWMAPE
MST4 DFGVAGQL----TDTQIK--RN--TFV---GTFPFWMAPE
YSK1/SOK1 DFGVAGQL----TDTQIK--RN--TFV---GTFPFWMAPE
TAO2/PSK DFGSASIMAPA-----N-SFV---GTFPYWMAPE
TAO1 DFGSASIM-AS-----PA--N-SFV---GTFPYWMAPE
TAO3/JIK DFGSASIM-AS-----PA--N-SFV---GTFPYWMAPE
KHS1 DFGVAAKI----TATIAK--RK--SFI---GTFPYWMAPE
KHS2 DFGVSAQI----TATIAK--RK--SFI---GTFPYWMAPE
GCK DFGVSGEL----TASVAK--RR--SFI---GTFPYWMAPE
HPK1 DFGISAQI----GATLAR--RL--SFT---GTFPYWMAPE
LOK DFGVSAKN----LTKLQK--RD--SFT---GTFPYWMAPE
SLK DFGVSAKN----TRTIAK--RD--SFT---GTFPYWMAPE
MEKK3 DFGASKRL--QTICMSGTG--MK--S-VT---GTFPYMSPE
MEKK2 DFGASKRL--QTICLSGTG--MK--S-VT---GTFPYMSPE
MAP3K8 DFGCARRLAWAGLNGTHSDMLKSMH---GTFPYWMAPE
MEKK1 DFGAAARLASKG--TGAGEFOGQLL---GTFAPMAPE
MAP3K4 DFGCSVKL----KNNAGT--MPGEVNSTLGTAAVMAPE
TAK1 DFGTACDI----QTHMTRNK-----GSAAMMAPE
ASK1 DFGTSKRL----AGINPC--TETFT---GTLQVMAPE
MEK1 DFGVSGQL----IDSM--N-SFV---GTRVMSPE
MEK2 DFGVSGQL----IDSM--N-SFV---GTRVMSPE
MEK5 DFGVSTQL----VNSTA--K-TTY---GTHAVMAPE
MKK6 DFGTSGYL----VDSVA--K-TMDA--GCKPYMAPE
MKK3 DFGTSGYL----VDSVA--K-TIDA--GCKPYMAPE
MKK4 DFGTSGQL----VDSIA--K-TRDA--GCRPYMAPE
MKK7 DFGTSGRL----VDSKA--K-TRSA--GCAVMAPE
COT DFGLSVQM----TEDVYF--PK-DR---GTEIVMSPE
NIK DFGHAVCL----OPDGLKSLTGDYIPGTEHMAPE
STLK6 GLSHLSLVKHKGRHRAVYDF--PQST--SVOVPLSPE
STLK5 GLRSNLSMISHGQRORVHDF--PKYSV--KVLPLWLSPE
PKCa DFGCMKEH----MMDGVTR--TFC---GTPDYIAPE
PKAa DFGFAKRV----KGR-----TWLTC---GTFPEYLAPE
Consensus sequence DFGxSxQL----xTxXR-Rx-TxV---GTFPFWMAPE
              A          S          S          I          Y

```

**Figure S2. Amino acid sequence alignment and comparison of myosin III with different species and various protein kinases. (A)** Amino acid sequence alignment of human myosin IIIA with other species. Hu, Homo sapiens; Mu, Mus musculus; Sa, Sarcophilus harrisii (Tasmanian devil); Ga, Gallus gallus; Xe, Xenopus; Mo, Morone saxatilis (striped sea bass); Dr, Drosophila. The activation loop is indicated with solid under line. Identified phosphorylated residues are indicated by grey boxes. The amino acid homology is indicated as follows: identical (asterisk), very similar (dot). **(B)** Sequence alignment of the activation loop of various protein kinases. Consensus sequence is shown at the bottom. Amino acid number of hMyo3A is shown at the top. STLK3, STE20/SPS1-related proline-alanine-rich protein kinase; OSR1, Serine/threonine-protein kinase OSR1; STLK6, STE20-related kinase adapter protein beta; STLK5, STE20-related kinase adapter protein alpha; PAK, p21-activated kinase PAK; MST1, Serine/threonine-protein kinase 4; MST2, Serine/threonine-protein kinase 3; MST3, Serine/threonine-protein kinase 24; MST4, Serine/threonine-protein kinase MST4; YSK1/SOK1, Serine/threonine-protein kinase 25; TAO2/PSK, Serine/threonine-protein kinase TAO2; TAO1, Serine/threonine-protein kinase TAO1; TAO3, Serine/threonine-protein kinase TAO3; KHS, Mitogen-activated protein kinase kinase kinase 5; KHS2, Mitogen-activated protein kinase kinase kinase 3; GCK, Mitogen-activated protein kinase kinase kinase 2; HPK1, Mitogen-activated protein kinase kinase kinase 1; LOK, Serine/threonine-protein kinase 10; SLK, STE20-like serine/threonine-protein kinase; MEKK3, Mitogen-activated protein kinase kinase kinase 3; MEKK2, Mitogen-activated protein kinase kinase kinase 2; MAP3K8, Mitogen-activated protein kinase kinase kinase 19; MEKK1, Mitogen-activated protein kinase kinase kinase 1; MAP3K4, Mitogen-activated protein kinase kinase kinase 4; TAK1, Mitogen-activated protein kinase kinase kinase 7; ASK1, Mitogen-activated protein kinase kinase kinase 5; MEK, ERK activator kinase; MKK; MAP kinase kinase; COT, Mitogen-activated protein kinase kinase kinase 8; NIK, Mitogen-activated protein kinase kinase kinase 14.

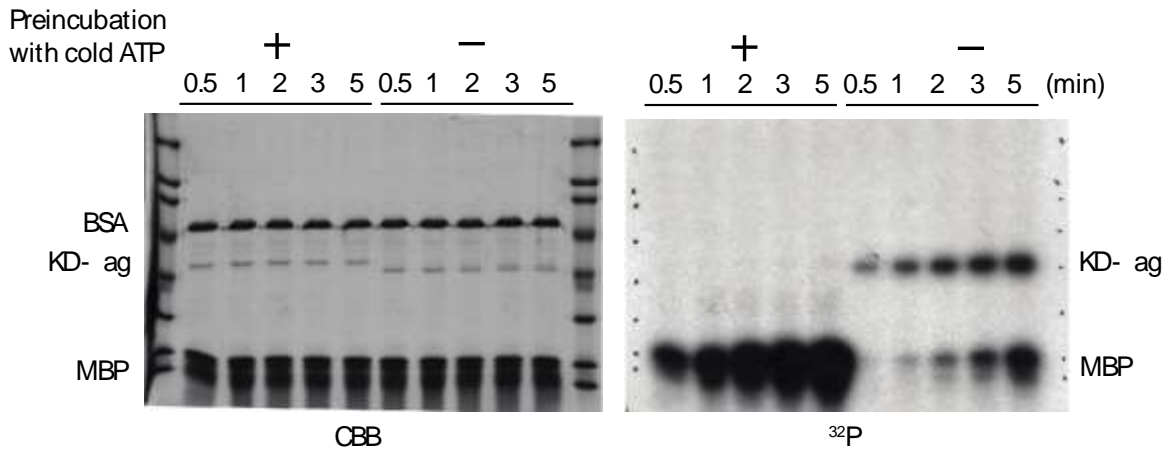

**Figure S3. Effect of autophosphorylation of hMyo3A-KD on its protein kinase activity.** hMyo3A-KD (10  $\mu\text{g/ml}$ ) was preincubated with or without 0.1 mM cold ATP for 90 min at 25°C, then 0.5 mM  $[\gamma\text{-}^{32}\text{P}]\text{-ATP}$  and 0.1 mg/ml MBP were added to the reaction mixture to start the reaction. After indicated times, the reaction was stopped by boiling with 5xSDS sample buffer, and subjected to SDS-PAGE. Left; Coomassie Brilliant Blue staining, right; autoradiography of the left. Note that migration of prephosphorylated hMyo3A-KD was a little slower than the non-phosphorylated one. No radioactive  $^{32}\text{P}$  incorporation was observed for prephosphorylated hMyo3A-KD due to saturation of the phosphorylation sites with non-radioactive phosphate.

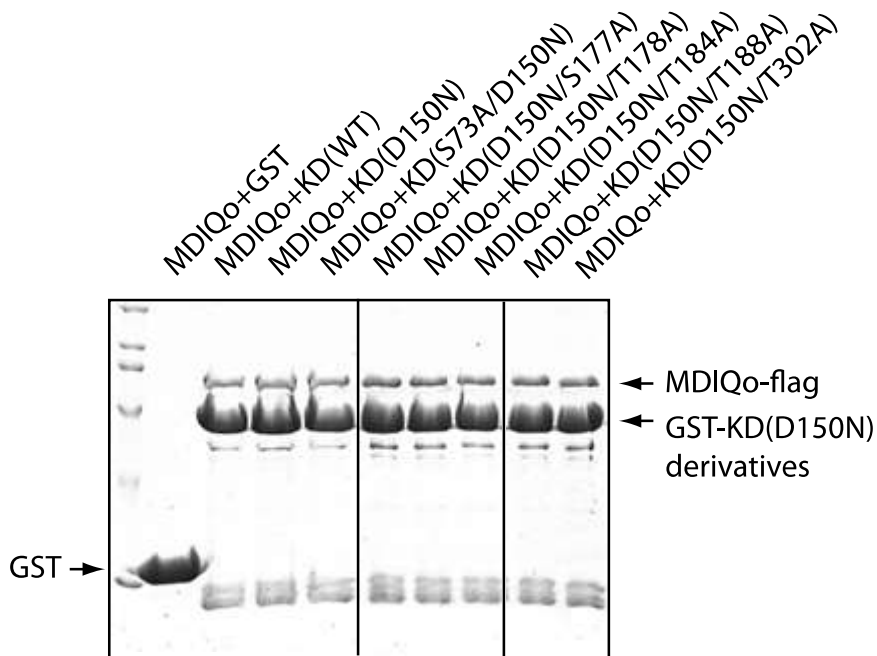

**Figure S4. Binding between the kinase domain and the motor domain of hMyo3A.** Binding experiment was done as described in Materials and Methods. All hMyo3A-KD variants have N-terminal GST module. Lane 1: MDIQo and GST, lane 2: MDIQo and GST-KD(WT), lane 3: MDIQo and GST-KD(N150D), lane 4: MDIQo and GST-KD(N150D/S73A), lane 5: MDIQo and GST-KD(N150D/S177A), lane 6: MDIQo and GST-KD(N150D/T178A), lane 7: MDIQo and GST-KD(N150D/T184A), lane 8: MDIQo and GST-KD(N150D/T188A), lane 9: MDIQo and GST-KD(N150D/T302A).

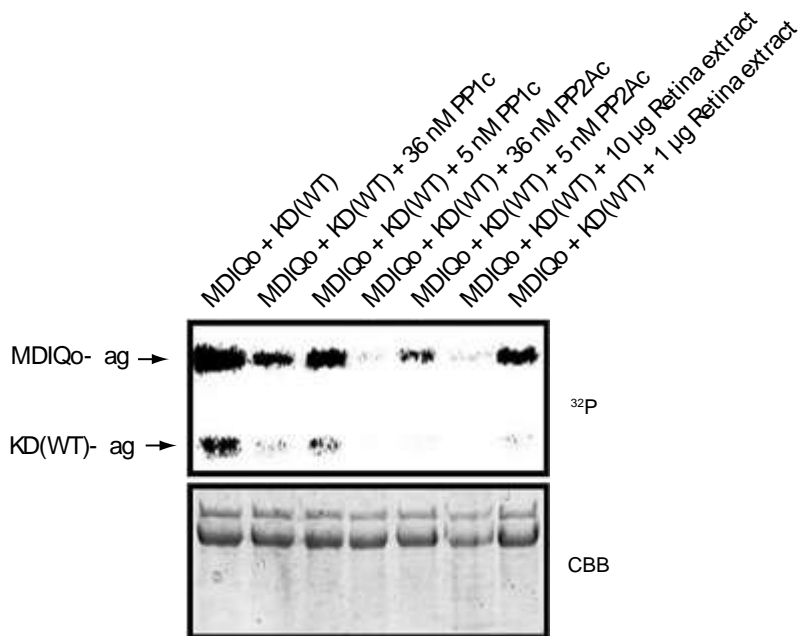

**Figure S5. Dephosphorylation of the motor domain of human myosin IIIA (hMyo3A-MDIQo) by PPases.** P-MDIQo (36 nM) and P-KD (36 nM) were dephosphorylated by PPases. Lane 1: P-MDIQo and P-KD, lane 2: P-MDIQo and P-KD with 36 nM of PP1c, lane 3: P-MDIQo and P-KD with 5 nM of PP1c, lane 4: P-MDIQo and P-KD with 36 nM of PP2Ac, lane 5: P-MDIQo and P-KD with 5 nM of PP2Ac, lane 6: P-MDIQo and P-KD with 50 µg/ml of retina tissue extract, lane 7: P-MDIQo and P-KD with 5 µg/ml of retina tissue extract. The bottom panel indicates samples stained with Coomassie Brilliant Blue R-250.
